# Supplementary material for: Thermal performance curves reveal shifts in optima, limits, and breadth in early life
Source: Oxford University Press journal article supplement (doi:10.1242/jeb.233254), 2020-01-01
Supplement: jeb233254supp.pdf [file jeb233254supp.pdf]

**Table S1. Development time of larvae (mean days  $\pm$  s.e.m.) at different test temperatures.**

Larvae did not complete development at test temperatures below 13°C and above 25 °C.

| Temperature (°C) | Development time (mean days $\pm$ s.e.m.) |
|------------------|-------------------------------------------|
| 13               | 22.8 $\pm$ 0.6                            |
| 17               | 16.8 $\pm$ 0.5                            |
| 21               | 15.3 $\pm$ 0.5                            |
| 25               | 13.0 $\pm$ 0.7                            |
